# Supplementary material for: SPARC independent drug delivery and antitumour effects of nab-paclitaxel in genetically engineered mice
Source: PubMed Central journal article supplement — Gut. 2013 Sep 25;63(6):974–83. doi: 10.1136/gutjnl-2013-305559 (PMC4033275; doi:10.1136/gutjnl-2013-305559), 2013-09-25
Supplement: gutjnl-2013-305559-s1.pdf [file gutjnl-2013-305559-s1.pdf]

## Supplemental material and methods:

### **Cell culture**

Cell lines were derived from murine KPC tumors as previously described<sup>1</sup> and maintained in DMEM (41966029, Invitrogen) + 10% FBS (SH30070.03, HyClone). Cancer associated fibroblast were obtained by serial trypsinization of small tumor pieces originating from *LSL-Kras<sup>G12D/+</sup>;Ptf1a-Cre* (KC) mice. Protein lysates were obtained using RIPA buffer with protease and phosphatase inhibitors.<sup>2</sup>

### **Automated quantification of immunohistochemistry:**

Automated quantification of IHC for cleaved caspase-3, phospho-histone H3 and ki67 was performed on 30 randomly chosen fields using the Ariol SL-50 imaging system and analysis software (Leica) as described.<sup>3</sup>

### **SPARC ELISA:**

Human SPARC ELISA Kit was purchased from Aviscera Bioscience Inc. (SK00766-01). Mouse EDTA plasma samples were diluted and compared to reference standards and processed according to the manufactures instructions. The lower limit of quantification for this assay was 0.128ng/ml.

### **Full blood counts:**

Full blood counts were obtained on terminal cardiac bleeds using a MS9-5 Veterinary Hematology Analyzer (Woodley Equipment Company Ltd.)

### Supplementary references:

1. **Hingorani SR**, Wang L, Multani AS, et al. Trp53R172H and KrasG12D cooperate to promote chromosomal instability and widely metastatic pancreatic ductal adenocarcinoma in mice. *Cancer Cell* 2005;**7**:469-83.
2. **Karreth FA**, DeNicola GM, Winter SP, et al. C-Raf inhibits MAPK activation and transformation by B-Raf(V600E). *Mol Cell* 2009;**36**:477-86.
3. **Frese KK**, Neesse A, Cook N, et al. nab-Paclitaxel potentiates gemcitabine activity by reducing cytidine deaminase levels in a mouse model of pancreatic cancer. *Cancer Discov* 2012;**2**:260-9.
