# Supplementary material for: SPARC independent drug delivery and antitumour effects of nab-paclitaxel in genetically engineered mice
Source: PubMed Central journal article supplement — Gut. 2013 Sep 25;63(6):974–83. doi: 10.1136/gutjnl-2013-305559 (PMC4033275; doi:10.1136/gutjnl-2013-305559), 2013-09-25
Supplement: gutjnl-2013-305559-s2.pdf [file gutjnl-2013-305559-s2.pdf]

**Suppl. Figure 1: A)** Western blot analysis of bulk KPC tumours (n=6), cancer associated fibroblast cell lines (CAFs, n=4) and KPC tumour cell lines (n=2) reveals predominant expression of SPARC in CAFs.

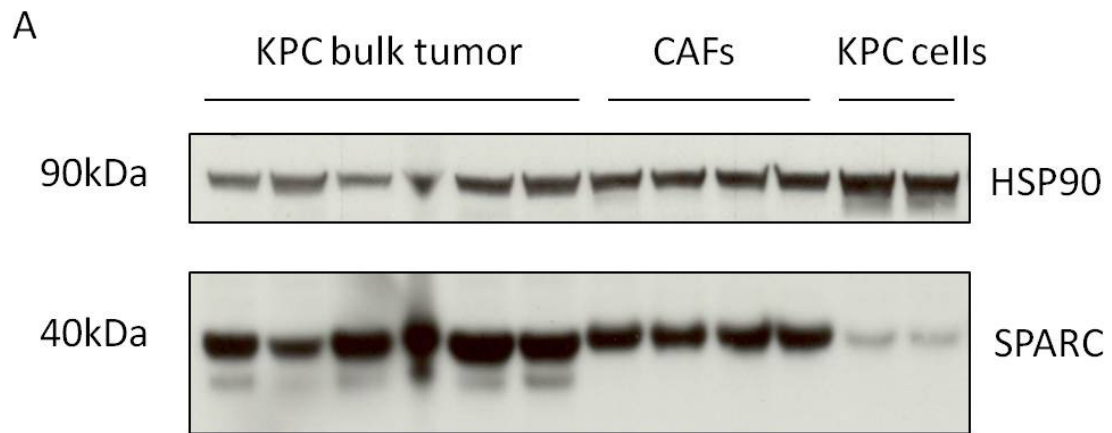

**Suppl. Figure 2: A+B)** C57B6 mice were treated with a single dose of *nab*-paclitaxel (n=5) or *m-nab*paclitaxel (n=5) at 30mg/kg by i.v. injection. Plasma and kidney tissues were harvested and assessed for paclitaxel levels 2h later by LC-MS/MS. **C)** Schematic of long-term trial for 60mg/kg *m-nab*-paclitaxel in tumour-bearing KPC mice (n=8).

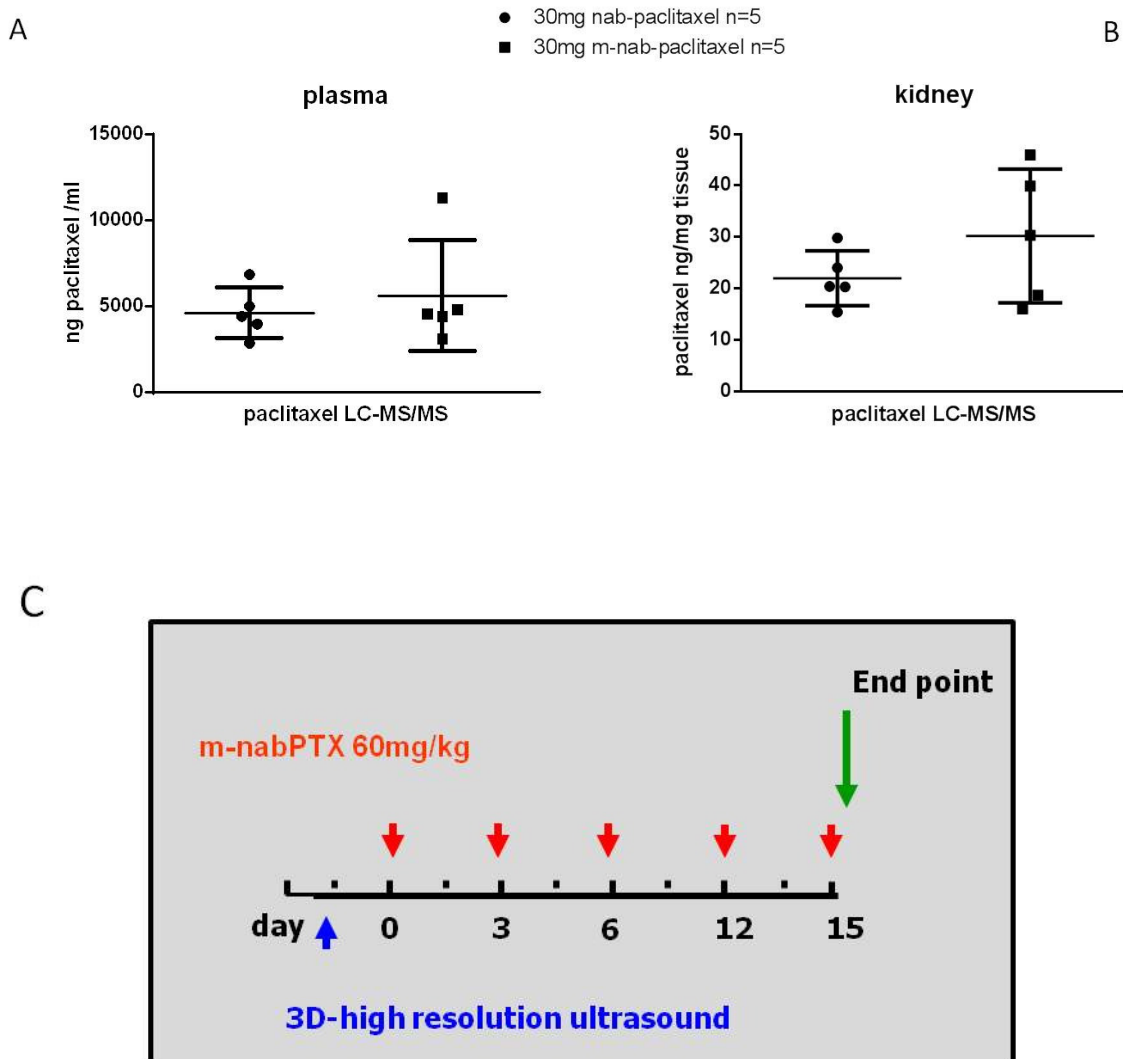

**Suppl. Figure 3: A)** Western blot analysis of whole tissue lysates from SPARC<sup>-/-</sup> (n=2) and SPARC<sup>+/+</sup> mice (n=2) from pancreas, kidney, liver and testis showing a faint expression of SPARC in normal pancreas and liver, and no detectable SPARC expression in SPARC<sup>+/+</sup> kidney samples. **B)** SPARC plasma levels in SPARC<sup>-/-</sup> mice (n=4), SPARC<sup>+/+</sup> mice (n=7) and tumour-bearing KPC mice (n=7, \*p<0.05 compared to SPARC<sup>-/-</sup>) by enzyme-linked immunosorbent assay. **C)** Mean vessel density (CD31) immunohistochemistry shows no significant differences between KPfC SPARC<sup>+/+</sup> and KPfC SPARC<sup>-/-</sup> testis tissue.

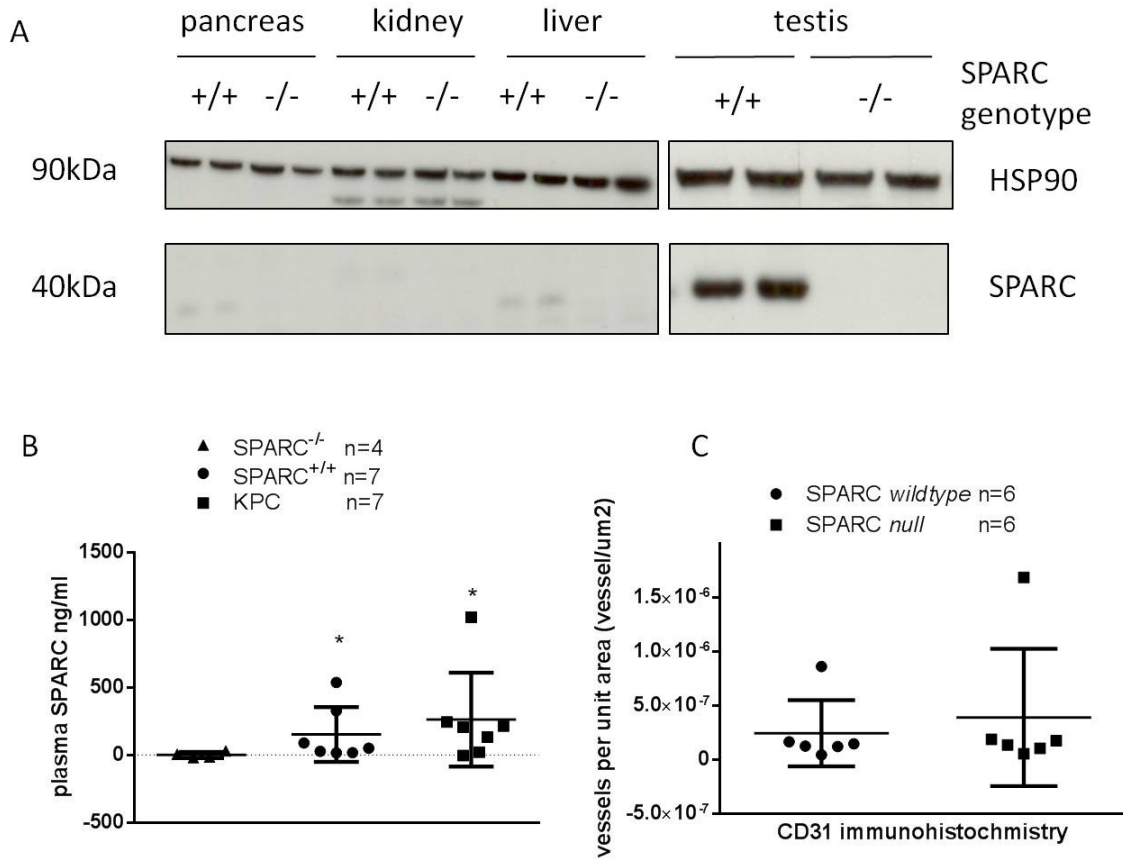

**Suppl. Figure 4:** **A)** Automated quantification of 30 randomly chosen fields for proliferation (ki67) and **B)** mean vessel density (CD31) immunohistochemistry shows no significant differences between KPfC SPARC<sup>+/+</sup> and KPfC SPARC<sup>-/-</sup> mice.

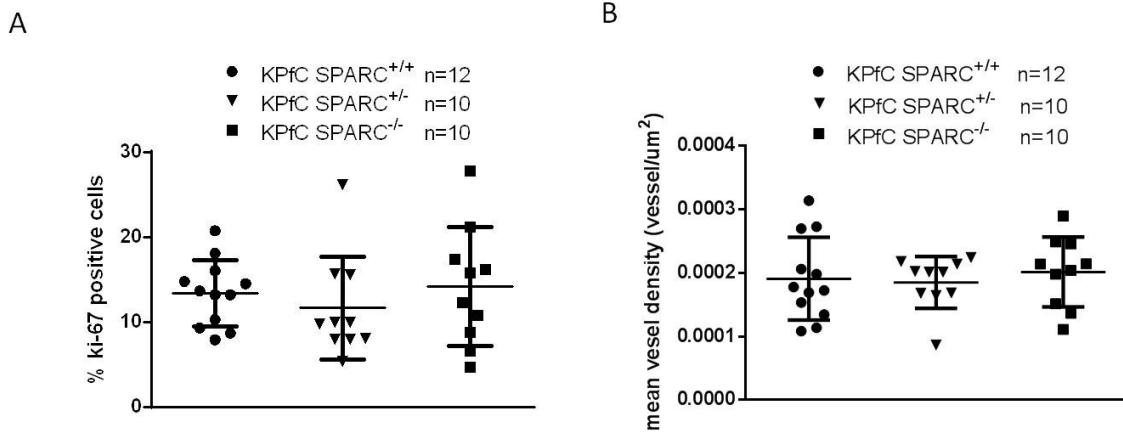

**Suppl. Figure 5:** LC-MS/MS analysis from **A)** kidney and **B)** plasma samples harvested from KPfC SPARC<sup>+/+</sup> and KPfC SPARC<sup>-/-</sup> mice 2h post intravenous injection of 60mg/kg *m-nabpaclitaxel*. **C)** Pre-enrolment tumour volumes of the 7d short term study (KPfC SPARC<sup>+/+</sup>, n=6; and KPfC SPARC<sup>-/-</sup>, n=5) showing no significant differences prior to enrolment. **D)** Schematic of short-term trial for 60mg/kg *m-nab-paclitaxel* in tumourbearing KPfC SPARC<sup>+/+</sup> and KPfC SPARC<sup>-/-</sup> mice. **E)** Analysis of terminal blood draws reveals no relevant differences in white blood cell count (WBC), neutrophil/granulocyte count, platelet count, and haemoglobin (Hb) in KPfC SPARC<sup>+/+</sup> and KPfC SPARC<sup>-/-</sup>.

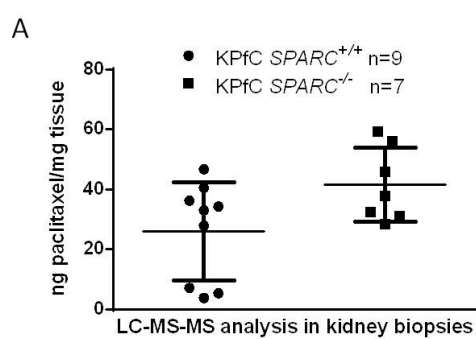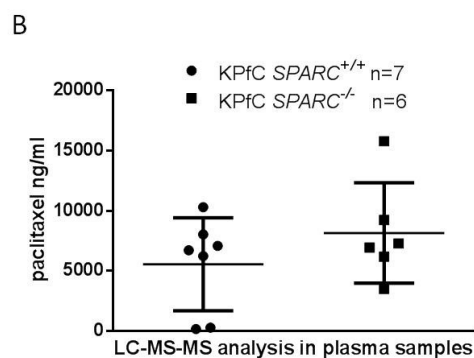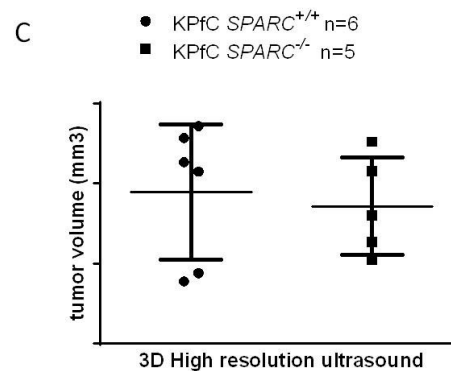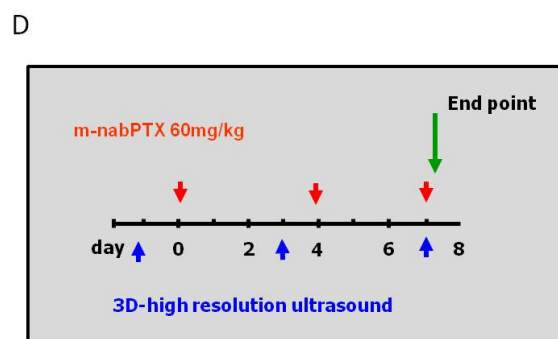

**E**

| Parameter                                | KPC <i>SPARC</i> null<br>(n=5) | KPC <i>SPARC</i> wildtype<br>(n=6) |
|------------------------------------------|--------------------------------|------------------------------------|
| Hb<br>(g/dl)                             | 10.7 ± 1.76                    | 9.0 ± 2.36                         |
| WBC<br>(10 <sup>6</sup> cell/ml)         | 6.95 ± 3.42                    | 3.16 ± 1.45                        |
| Neutrophils<br>(10 <sup>6</sup> cell/ml) | 1.52 ± 0.66                    | 0.933 ± 1.17                       |
| Platelets<br>(10 <sup>6</sup> cell/ml)   | 811.3 ± 395.2                  | 1014 ± 149.1                       |
